# Supplementary material for: Implementation of an International Vessel Wall MR Plaque Imaging Research Network: Experience with the ChAMPION Study
Source: MDPI journal article supplement (doi:10.3390/ctn6030016), 2022-06-24
Supplement: s1 [file s1]

**ChAMPION – SITE QUALIFICATION CASE REPORT FORM**

| #  | Question                                                                                                                                                                               | Answer                                                                                                                                                                                                                                                   |
|----|----------------------------------------------------------------------------------------------------------------------------------------------------------------------------------------|----------------------------------------------------------------------------------------------------------------------------------------------------------------------------------------------------------------------------------------------------------|
|    | Site Name                                                                                                                                                                              |                                                                                                                                                                                                                                                          |
|    | Name of Neurologist                                                                                                                                                                    |                                                                                                                                                                                                                                                          |
|    | Name of person completing this form                                                                                                                                                    |                                                                                                                                                                                                                                                          |
| 1  | How many patients who have 50-99% intracranial atherosclerosis (ICAS) that is either symptomatic or asymptomatic do you see annually at your site?                                     |                                                                                                                                                                                                                                                          |
| 2  | How was the answer to question #1 determined?                                                                                                                                          | <input type="checkbox"/> Analysis of registry or other database<br><input type="checkbox"/> Estimation<br><input type="checkbox"/> Both                                                                                                                  |
| 3  | What kind of MRI scanner does your institution use?                                                                                                                                    | <input type="checkbox"/> 1.5T<br><input type="checkbox"/> 3T<br><input type="checkbox"/> Both                                                                                                                                                            |
| 4  | What is the make and model of your MRI scanner(s)? (e.g. Siemens Trio)                                                                                                                 |                                                                                                                                                                                                                                                          |
| 5  | What version of scanner software are you currently using? (e.g. Siemens - VB17, VB19)                                                                                                  |                                                                                                                                                                                                                                                          |
| 6  | What type of head coil(s) do you have?<br>(Check all that apply.)                                                                                                                      | <input type="checkbox"/> 4 channel<br><input type="checkbox"/> 8 channel<br><input type="checkbox"/> 12 channel<br><input type="checkbox"/> 16 channel<br><input type="checkbox"/> 32 channel<br><input type="checkbox"/> Other (please list):           |
| 7  | Is High resolution MRI for ICAS currently available at your institution? (Select one answer.)                                                                                          | <input type="checkbox"/> Yes and we use it for our patients<br><input type="checkbox"/> Yes, but we do not use it for our patients<br><input type="checkbox"/> Yes, but it is used for research only<br><input type="checkbox"/> No, it is not available |
| 8  | If Question 7 is yes, provide the name and email address of the Neuroradiologist contact at your institution that is familiar with the HRMRI ICAS imaging technique being used.        | Name:<br><br>Email:                                                                                                                                                                                                                                      |
| 9  | If Question 7 is yes, <i>please have your <u>Neuroradiologist</u> complete the following question:</i><br>Have you successfully implemented HRMRI sequences from outside institutions? | <input type="checkbox"/> Yes<br><input type="checkbox"/> No                                                                                                                                                                                              |
| 10 | Have you implemented research protocols on patients with stroke in the past?                                                                                                           | <input type="checkbox"/> Yes<br><input type="checkbox"/> No                                                                                                                                                                                              |
| 11 | If Question 10 is yes, please list the studies you have participated in.                                                                                                               |                                                                                                                                                                                                                                                          |
| 12 | Do you currently have a research coordinator who can assist with subject recruitment, regulatory issues, and protocol implementation?                                                  | <input type="checkbox"/> Yes<br><input type="checkbox"/> No                                                                                                                                                                                              |
| 13 | If Question 12 is yes, please provide his/her name and email address.                                                                                                                  | Name:<br><br>Email:                                                                                                                                                                                                                                      |
